# Supplementary material for: Menthone lowers H3K27ac levels to inhibit Fusarium proliferatum growth
Source: Front Microbiol. 2025 Jan 22;16:1533918. doi: 10.3389/fmicb.2025.1533918 (PMC11794811; doi:10.3389/fmicb.2025.1533918)
Supplement: Supplementary file 2 [file Data_Sheet_2.xlsx]

## Sheet: Table S1
Primer Sequences for RT-qPCR
Gene ID	Forward primer	Reverse primer
FPRO_06392	AAGGCGCAAGACTAGAGACG	TCAACACAGTAGTGACGCCC
FPRO_01260	CTCCTCGAAGCCGAGATGAC	AGTAAGCTATCCGCTTCGGC
FPRO_01372	GGGCGAGACCAAGACTTTCA	AGGCAGGGACAGTAACAACG
FPRO_06284	AGGGAGCTTCGACTTCAGG	AGATCTGCCTCATCAGGAGC
FPRO_01894	ATGCTGTTTCGCTTCCGC	AAGCCTCCTTCTCCTCCG
FPRO_13101	TCATCTGTTGGTCATCCCG	TCGGATATCCAAGATCGCTG
QTUB	TTCTGCTGTCATGTCCGGTGT	TCAGAGGAGCAAAGCCAACCA

## Sheet: Table S2
The primer sequences for ChIP-qPCR
Gene ID	start	end	annotation	Forward primer	Reverse primer
FPRO_06392	2004107	2004804	Promoter (<=1kb)	ACGGACATATCCCTTCGC	TCAGATGGGAATTGACCGG
FPRO_01260	2537592	2537898	Promoter (<=1kb)	ATCGATCCCGATTCTTCCG	ATCATCGACACCGTGCTC
FPRO_01372	2187562	2187872	Promoter (<=1kb)	TCATTCGTCGGTTTCACCG	ACCTCGAAGATACCCTCCTC
FPRO_06284	2359092	2359366	Promoter (<=1kb)	AGGGCATTGATCCAAATGCC	TGTCATCGAGGATCTGGTGG
FPRO_01894	658111	658642	Promoter (<=1kb)	AGCAGACCTAGGCATCATCG	TCATACGCCAGCATCTCCTC
FPRO_13101	40089	41066	Promoter (<=1kb)	GACATCGTAGCAGGAGGTCG	AGCTCTTACATTGCAGCCCA
FPRO_02277	4555663	4556189	Promoter (<=1kb)	GGAATGCGAGCCATGATCAAC	GAGTCAGGGGGAACTTACTGTGTC
FPRO_05269	3382371	3382642	Promoter (<=1kb)	ACTCTCCGAACACTCAACCC	TAACGGGGCGTATCCATCAG
FPRO_04106	246653	246992	Promoter (<=1kb)	AGCGATCAAATCCGCAAACG	TACAGACGGAATGACGCACG
FPRO_06011	3158599	3158832	Promoter (<=1kb)	AAGTCGTCCCTGGATAACGG	TCGTCTGTAAGAGGGGAGCC
FPRO_10795	1619524	1619749	Promoter (<=1kb)	AAATCCTGCCCCACATAACC	CGGACATGATGACACTCAGTG
FPRO_06202	2580764	2580969	Promoter (<=1kb)	TCAAGGGCCTTCAGGCTTAC	AGTGGCTTTCCATCGAGCTG
FPRO_04822	1990147	1990925	Promoter (<=1kb)	GATACACTGCCAGCAATGCG	TTCGCGTATCAGGGTCATGG
FPRO_01685	1200489	1201767	Promoter (<=1kb)	CCTGCTACTGAAGGGGCATT	TCTCTGGGCGGAAAGATCAC

## Sheet: Table S3
Quality of Transcriptome Data
Sample	total reads	mapped	mapped reads	unmapped
Menthone-1	31773918	0.9196	29219295	2554623
Menthone-2	22535160	0.9156	20633192	1901968
Menthone-3	21251087	0.9142	19427744	1823343
CK-1	22026662	0.9332	20555281	1471381
CK-2	22280078	0.9259	20629124	1650954
CK-3	22842716	0.9013	20588140	2254576

## Sheet: Table S4
Quality of ChIP-seq
Sample	total reads	total mapped(%)	non_unique(%)	unique(%)	unmapped(%)
CK-H3H27ac	7011256	83.66	0.15	83.05	16.8
CK-input	10497114	86.99	0.19	84.57	15.24
Menthone-H3H27ac	10961706	81.3	0.14	80.78	19.09
Menthone-input	7802201	87.26	0.2	84.58	15.22

## Sheet: Table S5
Down-regulated genes that overlap with down H3K27ac
Gene_names	Protein_ID
FPRO_00389	XP_031076081.1
FPRO_00407	XP_031076063.1
FPRO_00427	XP_031076043.1
FPRO_00473	XP_031075997.1
FPRO_00796	XP_031075675.1
FPRO_00966	XP_031075506.1
FPRO_00971	XP_031075501.1
FPRO_01260	XP_031075213.1
FPRO_01291	XP_031075182.1
FPRO_01296	XP_031075177.1
FPRO_01323	XP_031075150.1
FPRO_01331	XP_031075142.1
FPRO_01372	XP_031075101.1
FPRO_01507	XP_031074966.1
FPRO_01885	XP_031074588.1
FPRO_01956	XP_031074517.1
FPRO_02216	XP_031078116.1
FPRO_02293	XP_031078040.1
FPRO_02442	XP_031077891.1
FPRO_02476	XP_031077857.1
FPRO_02823	XP_031077510.1
FPRO_02858	XP_031077475.1
FPRO_02922	XP_031077411.1
FPRO_03019	XP_031077314.1
FPRO_03020	XP_031077313.1
FPRO_03206	XP_031077127.1
FPRO_03351	XP_031076982.1
FPRO_03354	XP_031076979.1
FPRO_03393	XP_031076940.1
FPRO_03421	XP_031076912.1
FPRO_03472	XP_031076861.1
FPRO_03706	XP_031076627.1
FPRO_04120	XP_031089082.1
FPRO_04126	XP_031089076.1
FPRO_04128	XP_031089074.1
FPRO_04522	XP_031080218.1
FPRO_04651	XP_031080347.1
FPRO_04727	XP_031080423.1
FPRO_05085	XP_031080778.1
FPRO_05148	XP_031080841.1
FPRO_05191	XP_031080884.1
FPRO_05762	XP_031079639.1
FPRO_05783	XP_031079618.1
FPRO_05852	XP_031079549.1
FPRO_05903	XP_031079498.1
FPRO_05985	XP_031079417.1
FPRO_06266	XP_031079136.1
FPRO_06277	XP_031079125.1
FPRO_06284	XP_031079118.1
FPRO_06392	XP_031079010.1
FPRO_06414	XP_031078988.1
FPRO_06430	XP_031078972.1
FPRO_06470	XP_031078932.1
FPRO_06494	XP_031078908.1
FPRO_06741	XP_031078661.1
FPRO_07660	XP_031084014.1
FPRO_07663	XP_031084011.1
FPRO_07670	XP_031084004.1
FPRO_07730	XP_031083944.1
FPRO_07740	XP_031083934.1
FPRO_07781	XP_031083893.1
FPRO_07783	XP_031083891.1
FPRO_07861	XP_031083814.1
FPRO_07941	XP_031083734.1
FPRO_08021	XP_031083654.1
FPRO_08098	XP_031083577.1
FPRO_08444	XP_031087604.1
FPRO_09108	XP_031082399.1
FPRO_09188	XP_031082479.1
FPRO_09270	XP_031082561.1
FPRO_09313	XP_031082604.1
FPRO_09412	XP_031082702.1
FPRO_09579	XP_031082868.1
FPRO_09617	XP_031082906.1
FPRO_09718	XP_031083006.1
FPRO_09751	XP_031083039.1
FPRO_09818	XP_031083106.1
FPRO_09858	XP_031083146.1
FPRO_09877	XP_031083165.1
FPRO_10549	XP_031081552.1
FPRO_10568	XP_031081571.1
FPRO_10624	XP_031081627.1
FPRO_10628	XP_031081631.1
FPRO_10629	XP_031081632.1
FPRO_10654	XP_031081657.1
FPRO_10670	XP_031081673.1
FPRO_10673	XP_031081676.1
FPRO_10718	XP_031081721.1
FPRO_10795	XP_031081798.1
FPRO_10833	XP_031081836.1
FPRO_11204	XP_031082207.1
FPRO_11605	XP_031086692.1
FPRO_11673	XP_031086760.1
FPRO_11816	XP_031086902.1
FPRO_11902	XP_031086987.1
FPRO_12022	XP_031087106.1
FPRO_12772	XP_031088695.1
FPRO_12789	XP_031088712.1
FPRO_12811	XP_031088734.1
FPRO_13108	XP_031087975.1
FPRO_13203	XP_031088070.1
FPRO_13430	XP_031088296.1
FPRO_13639	XP_031088503.1
FPRO_14019	XP_031084801.1
FPRO_14142	XP_031084923.1
FPRO_15371	XP_031085988.1
FPRO_18116	NA
FPRO_18156	NA
FPRO_18267	NA
rrna6	NA

## Sheet: Table S6
KEGG enrichment analysis of low acetylation and transcriptionally downregulated genes (n = 110)
Term Name	Main Class	Gene Hits In Selected Set	All Genes In Selected Set	Gene Hits In Background	All Genes InB ackground	p-value	enrich Factor	Gene List In Selected Sets	corrected p-value (BH method)
03016 Transfer RNA biogenesis	A09180 Brite Hierarchies	4	25	151	4817	0.007022918343721485	5.1041059602649	[XP_031079118.1, XP_031079498.1, XP_031081798.1, XP_031079549.1]	0.3792375905609602
00030 Pentose phosphate pathway	A09100 Metabolism	2	25	35	4817	0.013857197440491409	11.010285714285715	[XP_031089082.1, XP_031084004.1]	0.37414433089326804
03009 Ribosome biogenesis	A09180 Brite Hierarchies	4	25	237	4817	0.03199983959198072	3.2519831223628692	[XP_031079010.1, XP_031081798.1, XP_031075213.1, XP_031075101.1]	0.5759971126556529
03110 Chaperones and folding catalysts	A09180 Brite Hierarchies	2	25	97	4817	0.08927146802254071	3.972783505154639	[XP_031082207.1, XP_031075101.1]	1.2051648183042996
00563 Glycosylphosphatidylinositol (GPI)-anchor biosynthesis	A09100 Metabolism	1	25	26	4817	0.12684603696092056	7.4107692307692306	[XP_031074966.1]	1.369937199177942
00053 Ascorbate and aldarate metabolism	A09100 Metabolism	1	25	29	4817	0.14044632003221458	6.644137931034483	[XP_031084004.1]	1.2640168802899312
B 09101 Carbohydrate metabolism	A09100 Metabolism	5	25	559	4817	0.15637905516627626	1.7234347048300538	[XP_031089082.1, XP_031084004.1, XP_031089076.1, XP_031077127.1, XP_031079417.1]	1.2063527112827026
03022 Basal transcription factors	A09120 Genetic Information Processing	1	25	34	4817	0.1626626975604245	5.667058823529413	[XP_031083734.1]	1.0979732085328655
A09150 Organismal Systems	A09150 Organismal Systems	1	25	37	4817	0.17572680370202864	5.207567567567567	[XP_031075101.1]	1.0543608222121719
B 09149 Aging	A09150 Organismal Systems	1	25	37	4817	0.17572680370202864	5.207567567567567	[XP_031075101.1]	1.0543608222121719
04213 Longevity regulating pathway - multiple species	A09150 Organismal Systems	1	25	37	4817	0.17572680370202864	5.207567567567567	[XP_031075101.1]	1.0543608222121719
00240 Pyrimidine metabolism	A09100 Metabolism	1	25	38	4817	0.18003785598392186	5.070526315789474	[XP_031078932.1]	0.8101703519276483
A09180 Brite Hierarchies	A09180 Brite Hierarchies	19	25	3154	4817	0.18570061083821754	1.160722891566265	[XP_031079010.1, XP_031078661.1, XP_031083734.1, XP_031079118.1, XP_031079498.1, XP_031074966.1, XP_031080778.1, XP_031079417.1, XP_031086692.1, XP_031075506.1, XP_031082207.1, XP_031075101.1, XP_031076861.1, XP_031084004.1, XP_031087975.1, XP_031079125.1, XP_031081798.1, XP_031079549.1, XP_031075213.1]	0.7713717680972112
00650 Butanoate metabolism	A09100 Metabolism	1	25	40	4817	0.18859511482464109	4.817	[XP_031079417.1]	0.7274383000379013
03420 Nucleotide excision repair	A09120 Genetic Information Processing	1	25	43	4817	0.20127044484852652	4.48093023255814	[XP_031083734.1]	0.7245736014546954
B 09121 Transcription	A09120 Genetic Information Processing	2	25	161	4817	0.20279781403565178	2.3935403726708073	[XP_031083734.1, XP_031075101.1]	0.6844426223703247
03021 Transcription machinery	A09180 Brite Hierarchies	2	25	170	4817	0.22007231514040326	2.266823529411765	[XP_031083734.1, XP_031080778.1]	0.6990532363283398
01004 Lipid biosynthesis proteins	A09180 Brite Hierarchies	1	25	48	4817	0.22197466831213886	4.014166666666667	[XP_031079417.1]	0.6659240049364166
03051 Proteasome	A09180 Brite Hierarchies	1	25	51	4817	0.23414884626132737	3.7780392156862748	[XP_031075101.1]	0.6654756683216673
03400 DNA repair and recombination proteins	A09180 Brite Hierarchies	2	25	187	4817	0.2530642552278555	2.0607486631016045	[XP_031083734.1, XP_031076861.1]	0.6832734891152098
99997 Function unknown	A09190 Not Included in Pathway or Brite	1	25	59	4817	0.2657258469187198	3.265762711864407	[XP_031088296.1]	0.6832950349338509
00280 Valine, leucine and isoleucine degradation	A09100 Metabolism	1	25	65	4817	0.2885843674132277	2.9643076923076923	[XP_031079417.1]	0.7083434472870134
01003 Glycosyltransferases	A09180 Brite Hierarchies	1	25	66	4817	0.29232708433550647	2.9193939393939394	[XP_031074966.1]	0.6863331545268413
02000 Transporters	A09180 Brite Hierarchies	3	25	366	4817	0.29477973209100994	1.5793442622950817	[XP_031078661.1, XP_031079125.1, XP_031086692.1]	0.6632543972047723
B 09194 Poorly characterized	A09190 Not Included in Pathway or Brite	1	25	68	4817	0.29975588995962643	2.8335294117647063	[XP_031088296.1]	0.6474727223127931
03008 Ribosome biogenesis in eukaryotes	A09120 Genetic Information Processing	1	25	73	4817	0.3180018153776929	2.639452054794521	[XP_031081798.1]	0.6604653088613622
03012 Translation factors	A09180 Brite Hierarchies	1	25	76	4817	0.3287293574224063	2.535263157894737	[XP_031079498.1]	0.6574587148448126
04144 Endocytosis	A09140 Cellular Processes	1	25	79	4817	0.33929480726093386	2.438987341772152	[XP_031075101.1]	0.6543542711460867
00360 Phenylalanine metabolism	A09100 Metabolism	1	25	79	4817	0.33929480726093386	2.438987341772152	[XP_031076912.1]	0.6543542711460867
03029 Mitochondrial biogenesis	A09180 Brite Hierarchies	2	25	238	4817	0.3523403244580008	1.619159663865546	[XP_031081798.1, XP_031075101.1]	0.6342125840244014
00520 Amino sugar and nucleotide sugar metabolism	A09100 Metabolism	1	25	84	4817	0.3565500496584164	2.2938095238095237	[XP_031089076.1]	0.6210871832759511
04141 Protein processing in endoplasmic reticulum	A09120 Genetic Information Processing	1	25	85	4817	0.3599487922653337	2.266823529411765	[XP_031075101.1]	0.6074135869477506
B 09183 Protein families: signaling and cellular processes	A09180 Brite Hierarchies	5	25	769	4817	0.3686728466814668	1.2527958387516256	[XP_031078661.1, XP_031084004.1, XP_031079125.1, XP_031086692.1, XP_031075101.1]	0.6032828400242185
00500 Starch and sucrose metabolism	A09100 Metabolism	1	25	90	4817	0.3766856067711256	2.1408888888888886	[XP_031077127.1]	0.598265375460023
B 09182 Protein families: genetic information processing	A09180 Brite Hierarchies	13	25	2262	4817	0.378948715188714	1.1073563218390805	[XP_031079010.1, XP_031083734.1, XP_031079118.1, XP_031079498.1, XP_031080778.1, XP_031075506.1, XP_031082207.1, XP_031075101.1, XP_031076861.1, XP_031087975.1, XP_031081798.1, XP_031079549.1, XP_031075213.1]	0.5846637320054444
01009 Protein phosphatases and associated proteins	A09180 Brite Hierarchies	1	25	93	4817	0.386525158672523	2.0718279569892473	[XP_031075101.1]	0.5797877380087846
03040 Spliceosome	A09120 Genetic Information Processing	1	25	99	4817	0.4057588109760224	1.9462626262626261	[XP_031075101.1]	0.5921885349379786
04147 Exosome	A09180 Brite Hierarchies	2	25	269	4817	0.41104627308970576	1.4325650557620817	[XP_031084004.1, XP_031075101.1]	0.584118388074845
B 09124 Replication and repair	A09120 Genetic Information Processing	1	25	104	4817	0.4213433710997895	1.8526923076923076	[XP_031083734.1]	0.5833985138304778
B 09107 Glycan biosynthesis and metabolism	A09100 Metabolism	1	25	107	4817	0.43050495779712006	1.800747663551402	[XP_031074966.1]	0.5811816930261121
B 09104 Nucleotide metabolism	A09100 Metabolism	1	25	110	4817	0.4395272072704852	1.7516363636363637	[XP_031078932.1]	0.5788894925025903
03011 Ribosome	A09180 Brite Hierarchies	1	25	138	4817	0.5173753627053166	1.396231884057971	[XP_031075506.1]	0.6651968949068356
04121 Ubiquitin system	A09180 Brite Hierarchies	1	25	153	4817	0.5546955513474789	1.2593464052287582	[XP_031087975.1]	0.6965944133200899
03041 Spliceosome	A09180 Brite Hierarchies	1	25	160	4817	0.5711481367637785	1.20425	[XP_031075101.1]	0.700954531482819
B 09181 Protein families: metabolism	A09180 Brite Hierarchies	3	25	614	4817	0.6349300159610172	0.9414332247557002	[XP_031074966.1, XP_031079417.1, XP_031075101.1]	0.7619160191532206
A09100 Metabolism	A09100 Metabolism	8	25	1623	4817	0.6445129114332325	0.9497473813924832	[XP_031078932.1, XP_031076912.1, XP_031089082.1, XP_031084004.1, XP_031089076.1, XP_031074966.1, XP_031077127.1, XP_031079417.1]	0.7566021134216208
B 09105 Amino acid metabolism	A09100 Metabolism	2	25	496	4817	0.7449956031158902	0.7769354838709678	[XP_031076912.1, XP_031079417.1]	0.8559523950693205
B 09123 Folding, sorting and degradation	A09120 Genetic Information Processing	1	25	270	4817	0.7644430157569321	0.7136296296296296	[XP_031075101.1]	0.8599983927265487
B 09141 Transport and catabolism	A09140 Cellular Processes	1	25	310	4817	0.8112417870679084	0.6215483870967743	[XP_031075101.1]	0.8940215612585113
A09120 Genetic Information Processing	A09120 Genetic Information Processing	3	25	811	4817	0.8178467952668663	0.7127496917385944	[XP_031083734.1, XP_031081798.1, XP_031075101.1]	0.8832745388882156
B 09122 Translation	A09120 Genetic Information Processing	1	25	329	4817	0.8302087589098879	0.5856534954407294	[XP_031081798.1]	0.8790445682575283
A09190 Not Included in Pathway or Brite	A09190 Not Included in Pathway or Brite	1	25	420	4817	0.8983978991432436	0.45876190476190476	[XP_031088296.1]	0.9329516644949069
A09140 Cellular Processes	A09140 Cellular Processes	1	25	428	4817	0.9029319383849765	0.4501869158878505	[XP_031075101.1]	0.9199683900526175
04131 Membrane trafficking	A09180 Brite Hierarchies	1	25	441	4817	0.9098883064613169	0.43691609977324264	[XP_031075101.1]	0.9098883064613169

## Sheet: Table S7
KEGG pathway	Gene ID	log2FoldChange	.padj	regulated	Gene function	Gene function
-	FPRO_03415	5.54	2.06e-46	Up	related to NAD-dependent histone deacetylase	related to NAD-dependent histone deacetylase
Membrane trafficking (ko04131)	FPRO_13046	1.34	4.79e-05	Up	related to histone deacetylase A	related to histone deacetylase A
Ribosome biogenesis (ko03009)	FPRO_06392	-2.17	8.84e-12	Down	related to BUD20 Protein involved in bud-site selection	related to BUD21 Protein involved in bud-site selection
	FPRO_01260	-3.68	7.62e-20	Down	probable NOC4 nucleolar protein	probable NOC5 nucleolar protein
	FPRO_01372	-2.42	0.000635519	Down	probable heat shock protein 70	probable heat shock protein 71
	FPRO_10795	-1.24	0.0144075	Down	related to RNase P subunit Pop3	related to RNase P subunit Pop4
Spliceosome (ko03041)	FPRO_01894	-1.15	3.94e-05	Down	related to pre-mRNA splicing factor	related to pre-mRNA splicing factor
	FPRO_13101	-3.31	1.06e-30	Down	related to tRNA splicing endonuclease gamma subunit	related to tRNA splicing endonuclease gamma subunit
Transfer RNA biogenesis (ko03016)	FPRO_06284	-1.42	0.000291158	Down	probable tRNA (guanine-N(1)-)-methyltransferase	probable tRNA (guanine-N(2)-)-methyltransferase
